1  
2  
3  
4  
5  
6  
7  
8  
9  
10  
11  
12  
13  
14  
15  
16  
17  
18  
19  
20  
21  
22  
23  
24  
25  
26  
27  
28

**ASSESSMENT OF ANESTHESIA ON PHYSIOLOGICAL STABILITY AND BOLD SIGNAL RELIABILITY  
DURING VISUAL OR ACOUSTIC STIMULATION IN THE CAT**

Alexandra Levine<sup>2,3†</sup>, Benson Li<sup>1†</sup>, Paisley Barnes<sup>2†</sup>, Stephen G. Lomber<sup>1-4†</sup>, and Blake E. Butler<sup>\*1,3,4</sup>

<sup>1</sup>Department of Psychology

<sup>2</sup>Department of Physiology & Pharmacology

<sup>3</sup>Brain and Mind Institute

<sup>4</sup>National Centre for Audiology

†Authors made equal contributions

University of Western Ontario

London, Ontario, Canada N6A 5B7

‡Present address:

Department of Physiology

McGill University

Montréal, Québec, Canada H3G 1Y6

**\*Correspondence should be addressed to:**

Dr. Blake Butler

Email: [bbutler9@uwo.ca](mailto:bbutler9@uwo.ca)

Phone: 519-661-2111 x85831

29 **Abstract:**

30 Background: Neuroimaging methods including fMRI provide powerful tools to observe whole-  
31 brain functional networks. This is particularly powerful in animal models, allowing these  
32 networks to be probed using complementary methods. However, most animals must be  
33 anesthetized for neuroimaging, giving rise to complications resulting from anesthetic effects on  
34 the animal's physiological and neurological functions. For example, an established protocol for  
35 feline neuroimaging involves co-administration of ketamine and isoflurane – the latter of which  
36 is known to suppress cortical function.

37  
38 New Method: Here, we compare this established protocol to alfaxalone, a single-agent  
39 anesthetic for functional neuroimaging. We first compare the two in a controlled environment  
40 to assess relative safety and to measure physiological stability over an extended time window.  
41 We then compare patterns of auditory and visually-evoked activity measured at 7T to assess  
42 mean signal strength and between-subjects signal variability.

43  
44 Results in Comparison with Existing Methods: We show that alfaxalone results in more stable  
45 respiratory rates over the 120 minutes testing period, with evidence of smaller between  
46 measurements variability within this time window, when compared to ketamine plus  
47 isoflurane. Moreover, we demonstrate that both agents evoke similar mean BOLD signals  
48 across animals, but that alfaxalone elicits more consistent BOLD activity in response to sound  
49 stimuli across all ROIs observed.

50  
51 Conclusions: Alfaxalone is observed to be more physiologically stable, evoking a more  
52 consistent BOLD signal across animals than the co-administration of ketamine and isoflurane.  
53 Thus, an alfaxalone-based protocol may represent a better approach for neuroimaging in  
54 animal models requiring anesthesia.

55  
56 **Keywords:** anesthesia, fMRI, physiological stability, animal models, stimulus-evoked, BOLD

57

## 58 **1. Introduction**

59 Experiments in animal models continue to be critical for understanding the structure  
60 and function of the brain. For decades, cats have been successfully used as an animal model to  
61 study sensory systems, largely due to the remarkable similarities that they share with human  
62 cell types, neural pathways, and cytoarchitecture (Blake, 1979). Electrophysiological (Hubel and  
63 Wiesel, 1962; Liu et al., 2010), neuroanatomical (Lomber et al., 1995; Wong et al., 2015; Butler  
64 et al., 2016), behavioral (Heffner and Heffner, 1988; Wong et al., 2018), and imaging studies  
65 (Brown et al., 2014; Butler et al., 2015; Stolzberg et al., 2018) undertaken in the cat have played  
66 a critical role in advancing our knowledge of neural processing within visual and auditory  
67 systems, and the interactions between the two.

68 Recently, there has been increased interest in non-invasive neuroimaging methods like  
69 functional magnetic resonance imaging (fMRI) for the study of sensory system function in  
70 animal models. This approach offers several advantages, including the ability to examine  
71 perception at the whole-brain level, and the ability to undertake longitudinal, within-animal  
72 studies of sensory system development (which in turn aids in reducing the number of animals  
73 required to power meaningful comparisons). This offers a distinct advantage over other  
74 methods such as electrophysiological studies, which are highly invasive and are limited in their  
75 capacity to evaluate processes occurring over spatially disparate neural networks. fMRI  
76 measures changes in the ratio of oxygenated to deoxygenated blood, or blood-oxygen-level-  
77 dependent (BOLD) signals (Ogawa et al., 1990). An increase in this BOLD signal is thought to  
78 reflect increased neuronal activity compared to a baseline measurement (Buxton and Frank,  
79 1997; Logothetis et al., 2001; Ferris et al., 2006). Moreover, by measuring the temporal  
80 coherence of the BOLD signal across spatially disparate areas of the brain, it is possible to  
81 estimate the degree to which these areas are functionally connected into networks that  
82 support perception and associated behaviors.

83 Modern fMRI scanners can provide spatial resolution with 1 mm precision, but the  
84 accuracy of these measures depends critically on minimizing subject movement within the  
85 scanner. While most human participants can be instructed to remain still during imaging  
86 sessions, this is not possible in most other animals, and meaningful measurements must thus

87 be taken under anesthesia. Anesthetic agents help minimize potential stress and fluctuations in  
88 behavior that can affect the quality of data retrieved. However, the use of anesthetics during  
89 fMRI necessitates due consideration be given to the effects of the drugs themselves (Ueki et al.,  
90 1992; Biermann et al., 2012), as these agents can influence neurovasculature by changing  
91 cerebral blood flow, blood volume, and rate of oxygen metabolism (Gao et al., 2017), and can  
92 suppress neuronal activity by reducing excitatory synaptic transmission or increasing inhibitory  
93 transmission (Richards, 1983). Further complications may include physiological variability based  
94 on the drug type, concentration, and route of administration (Peng et al., 2010; Nagore et al.,  
95 2013; Aksenov et al., 2015; Ros et al., 2017). Therefore, there is a need to establish a robust and  
96 reliable anesthetic protocol that will facilitate bridging the gap between animal and human  
97 neuronal organization and function.

98         Fortunately, decades of electrophysiological work in the cat has revealed a great deal  
99 about the effects of different anesthetic agents on recorded neural function. A common  
100 protocol involves the continuous infusion of ketamine alongside other agents such as sodium  
101 pentobarbital, xylazine, or diazepam to induce and maintain anesthesia (e.g. Heil and Irvine,  
102 1998; Miller et al., 2002; Pienkowski and Eggermont, 2009). This protocol has evolved over  
103 time; for example, early studies found that ketamine infusion reduces spontaneous and peak  
104 firing rates in auditory cortex (Zurita et al., 1994), possibly due to altered sensory perception  
105 and reduced cortical glucose metabolism (Crosby et al., 1982; Oye et al., 1992). To reduce the  
106 amount of ketamine required for anesthesia (and reduce these suppressive effects,  
107 accordingly), Jezard et al. (1997) proposed to pre-medicate with ketamine but maintain  
108 sedation with isoflurane (1-2%, gas). However, other studies showed that isoflurane redirected  
109 cerebral blood flow, and reduced neural activity recorded in various visual brain regions by up  
110 to 50% (Harel et al., 2002; Olman et al., 2003; White & Alkire, 2002). Isoflurane has recently  
111 been shown to suppress resting-state connectivity in the primary somatosensory cortex of non-  
112 human primates as well (Wu et al., 2016). Therefore, when establishing the protocol for initial  
113 fMRI experiments in the cat, Brown et al. (2013) reduced isoflurane concentrations to the  
114 minimum level required to maintain sedation (0.4-0.5%) and supplemented with a continuous  
115 rate infusion of ketamine (0.6-0.75 mg/kg/hr). Under this protocol, the authors were able to

116 record BOLD signal changes up to 6% in some but not all auditory regions. The protocol was  
117 used in subsequent auditory-evoked studies (Hall et al., 2014; Butler et al., 2015) and in an  
118 examination of resting-state connectivity using fMRI (Stolzberg et al., 2018).

119 In spite of successive revisions, the combination of isoflurane and ketamine is known to  
120 result in widespread cortical deactivation in other animals (e.g. Hodkinson et al., 2012).  
121 Moreover, these effects appear to differ by brain region/sensory modality such that the co-  
122 administration of ketamine and isoflurane may limit the ability to study sensory processes  
123 beyond audition (Oye et al., 1992; Ries & Puil, 1999; Hoflich et al., 2017). Thus, there remains a  
124 need to develop an anesthetic protocol that can induce and maintain a light anesthetic plane  
125 sufficient to suppress movement, without drastic reductions in cortical activity across multiple  
126 brain regions.

127 Several potential agents were considered in the current study with important limitations  
128 in mind. In addition to the complications related to isoflurane described above, ketamine is  
129 known to be a dissociative agent, disrupting the central nervous system and causing a cataleptic  
130 state with dose-dependent hallucinations; thus, some protocols in routine use (e.g. ketamine  
131 plus diazepam/midazolam/xylazine) were deemed suboptimal for sensory-evoked  
132 neuroimaging. Moreover, a single-agent approach was considered practical in order to avoid  
133 complications inherent to maintaining a stable level of anesthesia during dynamic and complex  
134 drug interactions (an assumption critical to interpreting neuroimaging data averaged over  
135 extended time periods). In addition, many agents were excluded because their mechanism of  
136 action was deemed not conducive for measuring BOLD signals (Table 1). Others were  
137 eliminated in consultation with veterinary care staff due to concerns with respect to  
138 physiological effects. As a result, alfaxalone was considered to be the strongest candidate  
139 protocol to serve as an alternative to the coadministration of ketamine and isoflurane as a  
140 primary anesthetic agent for fMRI. Alfaxalone: i) has dose-dependent effects on  
141 cardiovascular, respiration, neuronal activity, and neuromusculature (Warne et al., 2015;  
142 Whitem et al., 2008; Muir et al., 2009; Taboada and Murison, 2010; Baldy-Moulinier et al.,  
143 1975) which may allow for more predictable changes in BOLD response; ii) has been found to  
144 sufficiently maintain a stable level of anesthesia for up to 2-hours as a stand-alone agent

145 (Tamura et al., 2015; Deutsch et al., 2017) which in our experience is the typical amount of time  
 146 required for neuroimaging in cats; and iii) has been successfully administered intravenously to  
 147 maintain anesthesia in cats during surgical procedures in our own laboratory, and by others  
 148 (Beths et al., 2014; Nagakubo et al., 2017) with minimal physiological side effects.

149 **Table 1.** Studies examining cardiovascular, respiratory, and neural effects of anesthetic agents.

| Anesthetic      | Primary Mechanism                 | First Author and Year     | Reason for Exclusion              |
|-----------------|-----------------------------------|---------------------------|-----------------------------------|
| Pentobarbital   | GABA <sub>A</sub> Agonist         | Kaitin (1985)             | Suppressed cortical activity      |
|                 |                                   | Morin-Surun et al. (1984) | Inhibition of respiratory neurons |
| Propofol        | GABA <sub>A</sub> Agonist         | Lahti et al. (1999)       | Decreased BOLD signal intensity   |
|                 |                                   | Bonhomme et al. (2000)    | Reduced cerebral blood flow       |
|                 |                                   | Dueck et al. (2005)       | Decreased BOLD signal intensity   |
| Butorphanol     | Opioid ( $\kappa$ -type)          | Paddleford (1999)         | Long-acting (up to 4-hours)       |
| Fentanyl        | Opioid ( $\mu$ -type)             | Peng et al. (2010)        | Suppressed cortical activity      |
|                 |                                   | Freeman et al. (1967)     | Reduced cortical blood flow       |
| Dexmedetomidine | Adrenergic ( $\alpha_2$ ) Agonist | Fukuda et al., 2013       | Reduced cerebral blood flow       |

150  
 151 Here, we compare an alfaxalone (Alf) protocol with a previously established protocol  
 152 consisting of a combination of isoflurane and ketamine (Iso+Ket), providing detailed measures  
 153 of physiological stability as well as evoked activity in cats during fMRI. The investigation is  
 154 separated into two parts; in the first study, we evaluate the physiological stability of each  
 155 protocol in an operating suite. A light anesthetic plane was maintained for a minimum of 2-  
 156 hours while cats were exposed to mock scanner noises at 90 dB and vital signs (heart rate,  
 157 respiratory rate, end-tidal CO<sub>2</sub>, blood pressure, etc.) were recorded. In the second study, both  
 158 protocols were employed in the scanner while BOLD signal changes were recorded in response

159 to visual and auditory stimuli. This study is the first to evaluate different anesthetic protocols in  
160 cats by directly comparing BOLD signal responses. Quantification of these signals will provide  
161 insight into the contribution of different anesthetics on neural activity, and potentially offer an  
162 alternative option to the combination of isoflurane and ketamine.

## 163 **2. Methods**

### 164 *2.1 Animals*

165 Two healthy adult domestic short-hair cats were used in study one, and a total of 12  
166 cats were compared in the second study. Animals were born to pregnant queens obtained from  
167 a commercial laboratory animal breeding facility (Liberty Labs, Waverly, NY), and were housed  
168 as a cowlower. Normal hearing status was confirmed at approximately 3 months of age using  
169 auditory brainstem responses. All procedures were conducted in accordance with the Canadian  
170 Council on Animal Care's Guide to the Care and Use of Experimental Animals and were  
171 approved by the University of Western Ontario Animal Use Subcommittee of the University  
172 Council on Animal Care.

### 173 *2.2 Study 1: Physiological Stability during Anesthesia*

#### 174 *2.2.1 Anesthesia*

175 The first study was conducted in a surgical suite in order to evaluate the safety and  
176 stability of the selected protocols. In the Alf protocol, the animal was first pre-medicated with  
177 dexdomitor (0.04 mg/kg, i.m.) prior to catheter placement. Sedation was confirmed after 10  
178 minutes by the absence of a paw-pinch reflex. Ophthalmic ointment was applied to prevent  
179 drying of the eyes, body temperature was maintained at 37°C using a circulating warm water  
180 pad, and an indwelling 22g catheter was placed in the cephalic vein to facilitate maintenance of  
181 anesthesia. A bolus dose of alfaxalone (0.3-0.5 ml, i.v.) was administered to achieve deeper  
182 anesthesia and the animal's larynx was sprayed with xylocaine prior to intubation. The animal  
183 was placed in a sternal position on the surgical table, and anesthesia was maintained through  
184 continuous infusion of alfaxalone (7 mg/kg/hr, i.v.), while 100% oxygen was provided at a rate  
185 of 1.0L/min. Finally, a bolus dose of atipamezole (0.27 ml, i.m.) was administered to reverse any  
186 residual effects of the dexdomitor.

187 For the Iso+Ket protocol, animals were pre-medicated with a combination of  
188 dexdomitor (0.022 mg/kg, i.m.), ketamine (4 mg/kg, i.m.), and acepromazine (0.05 mg/kg, i.m.).  
189 Sedation was confirmed, the animal's core temperature was maintained, ophthalmic ointment  
190 was applied, and a catheter was placed for anesthetic maintenance as above. The animal was  
191 placed in a sternal position on the surgical table, and a continuous infusion of ketamine (5  
192 ml/kg/hr, i.v.), combined with gaseous isoflurane (0.5% in oxygen provided at a rate of  
193 1.0L/min) was used to maintain anesthesia. The reversal of dexdomitor was not necessary in  
194 this protocol as premed volume was lower and consequently would not be expected to have  
195 effects lasting into the experimental period. Approximately 60 minutes into the session, the  
196 rate of ketamine infusion was increased to 6.25 ml/kg/hr (i.v.) and isoflurane was reduced to  
197 0.25% in order to mimic the protocol developed previously for imaging, in which these changes  
198 are required prior to functional image acquisition to optimize BOLD signal.

199 At the end of each session, anesthesia was discontinued, and animals were monitored  
200 until they recovered fully from anesthetic effects. Animals anesthetized with alfaxalone  
201 received a bolus dose of butorphanol (0.2 mg/kg, s.c.; opioid analgesic) to counteract  
202 hyperkinesia, a side-effect commonly observed during post-anesthetic recovery from prolonged  
203 IV administration of alfaxalone in cats (Whittem et al., 2008). The intubation tube was removed  
204 when the animal exhibited a gag reflex and increased jaw tone, and following recovery, the  
205 indwelling catheter was removed and the animal was returned to their cower. Each agent was  
206 tested twice in each animal for a total of 4 sessions per agent.

### 207 *2.2.2 Data Recording*

208 To mimic conditions in the scanner, the animal was presented with previously recorded  
209 scanner noise through foam insert earbuds (Sensimetric S14) at 90 dB SPL for the duration of  
210 experimental sessions. Each agent's ability to induce anesthesia, maintain a lightly sedated  
211 state for 2-hours, and to allow for uneventful recovery was noted. Anesthetic and physiological  
212 stability was evaluated by monitoring and recording parameters including autonomic reflexes  
213 (e.g. paw-pinch, gag, palpebral) and vital signs (e.g. heart rate, end-tidal CO<sub>2</sub>, respiratory rate,  
214 peripheral capillary oxygen saturation, blood pressure, and mean arterial pressure) in 5-minute  
215 intervals.



## 217 2.3 Study 2: fMRI

218 The second study sought to compare the auditory- and visually- evoked BOLD signals  
219 recorded while animals were anesthetized with each candidate agent. A group of 6 cats were  
220 scanned while anesthetized with alfaxalone, and results were compared to a group of 6 sex-  
221 and age-matched animals scanned previously using the exact same equipment and  
222 experimental procedure.

### 223 2.3.1 Animal Preparation and Anesthesia

224 For both the Iso+Ket and Alf protocols, anesthesia was induced and maintained as  
225 described for Study 1 above. Once anesthetized, the animal was placed in a sternal position  
226 within a custom-built Plexiglass sled. Phenylephrine hydrochloride and atropine sulfate  
227 ophthalmic solutions were applied to both eyes to dilate the pupils and retract the nictitating  
228 membranes. Lubricated contact lenses were placed in both eyes (a blackout lens in the left eye,  
229 and a clear lens in the right eye). This permitted visual stimuli to be brought into focus on the  
230 retina and have visual signals preferentially sent to the left hemisphere. MRI-compatible foam  
231 insert earphones (Sensitmetrics S14) were inserted in each ear to allow for the presentation of  
232 auditory stimuli, and the animal's head was stabilized within a custom 8-channel radio-  
233 frequency (RF) coil. Vital signs (heart rate, respiratory rate, end-tidal CO<sub>2</sub>, inspiratory CO<sub>2</sub>,  
234 percent oxygen saturation, systolic/diastolic and mean blood pressure, and rectal body  
235 temperature) were monitored throughout the scanning session. At the conclusion of the  
236 imaging session, anesthesia was discontinued and animals were recovered as outlined in Study  
237 1 above.

### 238 2.3.2 Stimuli

239 Visual stimuli were generated with PsychoPy (Peirce, 2007; 2009) and presented  
240 through a Dell laptop to an Avotec SV-6011 Rear Projector. From their sternal position within  
241 the bore of the magnet, the animals eyes were located approximately 75 cm from an acrylic  
242 screen (H = 14.5 cm, W = 19cm), which was viewed through a custom-built mirrored periscope.  
243 The stimulus extended 14.5 visual degrees horizontally and 11 degrees vertically and consisted  
244 of a black and white flickering checkerboard (8 ring-segments of 16 wedges) on a grey  
245 background (100% luminance contrast, 50% luminance background), counter-phase flickering at

246 5Hz. The stimulus was arranged in a simple ON/OFF block design, where the OFF block  
247 consisted of a blank grey screen, each block lasting 30s. The animal's gaze was assessed visually  
248 through the scanner bore before the acrylic screen was placed at the end of the bore.

249 Auditory stimuli were generated using Audacity® recording and editing software  
250 (Audacity Team, 2019), and consisted of a 30s stimulus consisting of 400ms broadband noises  
251 separated by 100ms silent gaps. This stimulus was arranged in an ON/OFF block design, where  
252 the OFF block consisted of a 30s period of silence. Sounds were presented diotically from a Dell  
253 laptop through an external Roland Corporation soundcard (24-bit/96 kHz; Model UA- 25EX), a  
254 PylePro power amplifier (Model PCAU11), and Sensimetrics MRI-compatible ear inserts (Model  
255 S14). All stimuli were calibrated to 80-90 dB SPL using an ear simulator (Bruel & Kjaer, Model #  
256 4157).

### 257 *2.3.3 Scanning Parameters*

258 Data were collected using an ultra-high-field 7T Siemens MRI human head-only scanner  
259 located at the Centre for Functional and Metabolic Mapping at the Robarts Research Institute  
260 operating at a 350 mT/m/s slew rate. An automated 3D mapping procedure (Klassen & Menon,  
261 2004) was used to optimize the magnetic field ( $B_0$  shimming) over the specific volume of  
262 interest.

263 High-resolution structural T1-weighted MP2RAGE images were acquired prior to  
264 functional scanning with the following parameters: isotropic voxel size of  $0.5\text{mm}^3$ , 80 slices,  
265 FoV=96mm, TE=3.95ms, TR= 6000ms, TI =800ms, and a flip angle of 4. Functional images were  
266 acquired over the whole brain in axial orientation with a single shot echo-planar imaging (EPI)  
267 acquisition with grappa acceleration and the following parameters: isotropic voxels  $1\text{mm}^3$ , 38  
268 slices (interleaved), FoV=72mm, TE=22.0ms, TR= 2000ms and a flip angle of 60 degrees. Each  
269 functional scan (visual- and auditory-evoked) lasted six minutes, and consisted of alternating 30  
270 second blocks of stimulus and baseline conditions.

### 271 *2.3.4 Image Analysis*

272 T1-weighted structural images were processed with a combined approach of automated  
273 and manual processing. The structural images were skull-stripped with use of MRIcron (NITRC;

274 Rorden & Brett, 2000) and FSLmath functions (FMRIB's toolbox, Oxford, UK; Smith et al., 2004,  
275 <http://fsl.fmrib.ox.ac.uk/fsl/fslwiki/>).

276 First-level statistical analysis of each animal's functional data was carried out using FEAT  
277 processing in FSL (Woolrich et al., 2001). The functional images were skull stripped using FSL's  
278 Brain Extraction Tool (BET). Preprocessing began with the removal of the first 2 volumes (4s) of  
279 the scan to allow for the scanner magnetic field to stabilize and reach magnetic saturation.

280 The following were also applied: motion correction (MCFLIRT; though the movement is  
281 nearly non-existent during these procedures), spatial smoothing (Gaussian, FWHM, 2mm) and a  
282 temporal high-pass filter cut off (0.01Hz/60s). First-level general linear model analysis (FILM)  
283 was then carried out, where regressors for each condition-block were convolved with a gamma  
284 hemodynamic response function (phase = 0, standard deviation = 3s, mean lag = 6s; the BOLD  
285 signal time course in cats has been shown to closely resemble that observed in humans and  
286 non-human primates [Brown et al., 2013]).

287 Each individual EPI sequence underwent time series pre-whitening (Smith et al., 2004),  
288 allowing us to carry through contrasts for higher-level analysis to test for group effects;  
289 individual animal GLM results were co-registered to the coordinate space of the high-resolution  
290 structural image for each participant using FMRIBs Linear Image Registration Tool (FLIRT;  
291 Jenkinson et al., 2002). Further analysis compared differences in average BOLD signal change  
292 under each anesthetic agent across all voxels within a given region of interest. Visual ROIs  
293 included primary visual cortical areas 17, 18 and 19, as well as the lateral geniculate nuclei  
294 (LGN) of the thalamus. Auditory ROIs included primary (A1) and second (A2) auditory cortex  
295 and the medial geniculate nuclei (MGN) of the thalamus.

296 Mean BOLD signal changes (relative to baseline) evoked by visual and auditory stimuli  
297 were extracted for each ROI of each animal, using FEATquery (FMRIB toolbox in FSL). To carry  
298 this out, FEATquery takes each participant's high-resolution structural scan and co-registers it  
299 to the feline template space (CATLAS, Stolzberg et al., 2017) using FLIRT multi-registration, in  
300 which all the predefined functional ROIs are defined (Fig. 1).

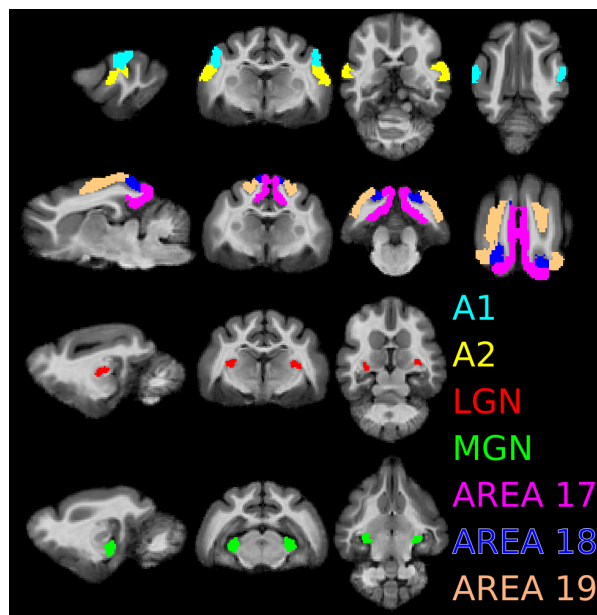

301

302 **Figure 1.** Visual and auditory regions of interest (ROIs) used in analysis displayed in  
303 feline template space (CATLAS; Stolzberg et al., 2017). Visual ROIs (LGN, 17/18/19)  
304 contralateral to the open eye were isolated for analysis.

305

### 306 **3. Results**

#### 307 *3.1 Study 1 - Physiology*

308 Two animals were observed two times under each anesthetic protocol in the operating  
309 suite to evaluate the stability of heart and respiratory rates across anesthetics. These  
310 physiological measures are commonly yolked; in practice, respiratory rate is used as an  
311 indicator of anesthetic depth where high rates are more representative of an awake state  
312 (Myles, 2007). The data from the present evaluation, averaged across animals and runs for each  
313 anesthetic agent tested, are presented in Figure 2A. To examine the variability in heart and  
314 respiratory within a test session, the change in each measure between successive timepoints  
315 (i.e. the change in heart/respiratory rate across each 5-minute interval; values presented in  
316 Figure 2B) was calculated, and a Wilcoxon rank-sum test with continuity correction was  
317 conducted. On this time scale, changes in heart rate were not different across anesthetics ( $W =$   
318  $3466.5$ ,  $p = 0.0843$ ); however, the respiratory rate differed significantly ( $W = 1937.5$ ,  $p < 0.001$ )  
319 suggesting greater within-session stability under alfaxalone compared to the coadministration  
320 of ketamine and isoflurane.

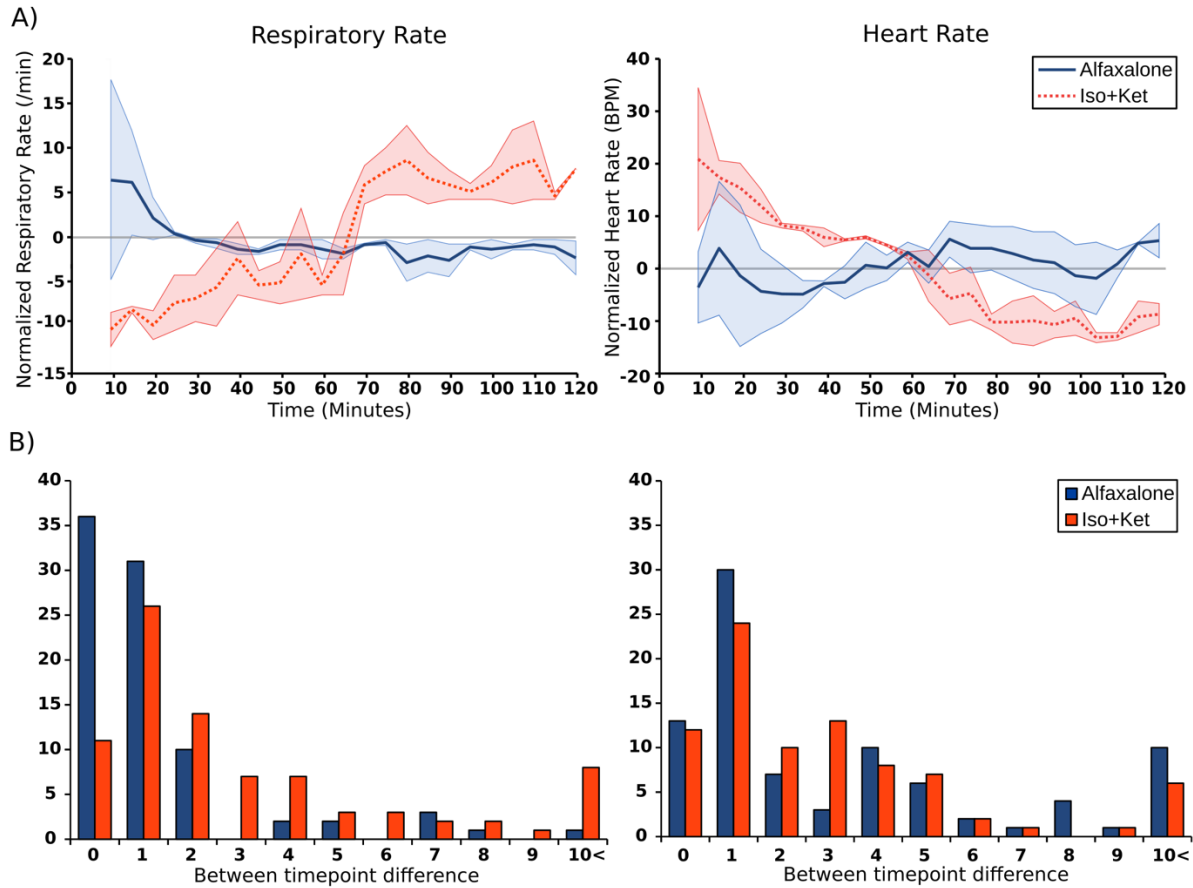

321

322

323 **Figure 2.** A) Normalized respiratory rates (breaths per min) and heart rates (beats  
324 per min) under alfaxalone and co-administered ketamine and isoflurane. Data were  
325 normalized to the mean rate for an individual run, and then normalized values were  
326 averaged across animals and runs. Shaded regions represent the standard error of  
327 the mean. The first 10 minutes of each measurement period were omitted from  
328 analysis to account for setup of monitoring/recording devices. B) A histogram  
329 representing change magnitude in successive measurements of respiratory and  
330 heart rate under each anesthetic tested. Lower values indicate relative stability in  
331 the variable measured, while larger values indicate increased variability over time.

332

333 It is important to note that increased variability under ketamine plus isoflurane is not  
334 entirely due to the drugs per se; imaging under this protocol requires that the rate of ketamine  
335 infusion be increased and the concentration of isoflurane reduced approximately 60 minutes  
336 into a testing session in order to acquire functional images with measurable BOLD signal (Brown  
337 et al., 2013; Stolzberg et al., 2018). As a result, physiological measures such as heart rate and

338 respiratory rate often change dramatically at this point in time (observable in Figure 2A). As  
339 described above, these shifts indicate drift towards a lighter anesthetic plane, as is necessary to  
340 provide increased BOLD signal in the presence of isoflurane. However, this also increases the  
341 risk of the animal becoming alert, which should be avoided. In contrast, the rate of alfaxalone  
342 infusion can remain unchanged for the duration of the session, resulting in more stable vital  
343 signs throughout.

## 344 *3.2 Study 2 - fMRI*

### 345 *3.2.1 BOLD signal strength*

346 To examine whether a global difference in BOLD signal amplitude exists between  
347 anesthetics, normalized percent BOLD signal changes (hereafter referred to as BOLD signals)  
348 were extracted from all selected ROIs, in each animal.

349 As an initial test, a mixed ANOVA was performed on these BOLD signals, where  
350 anesthetic protocol (Iso+Ket/Alf) was treated as a between-subjects factor, and within-subject  
351 factors included two stimulus types (auditory/visual) and seven ROIs (auditory cortical areas A1  
352 and A2, the MGN, visual cortical areas 17, 18, and 19, and the LGN). A significant interaction  
353 was observed between stimulus type and ROI ( $F[11, 110] = 13.505, p < 0.001$ ) demonstrating  
354 that across anesthetic protocols, the BOLD signal observed in a given ROI depended on the  
355 nature of the stimulus presented. The comparison of between-subjects effects across all  
356 regions and conditions revealed no significant effect of anesthetic protocol ( $F[1, 10] = 1.108, p =$   
357  $0.337$ ). Overall, these results indicate that, as expected, auditory and visual stimuli evoke  
358 different patterns of activity across sensory brain regions. Moreover, the patterns of evoked  
359 activity are similar across the anesthetics tested. While this suggests that both alfaxalone and  
360 co-administered ketamine and isoflurane may be appropriate for imaging experiments, this  
361 analysis provides little insight into the consistency and stability of the BOLD signal measured  
362 under each. We thus conducted planned post-hoc tests investigating the variability of these  
363 signals.

### 364 *3.2.2 BOLD signal variability*

365 Figure 3 shows the BOLD signals recorded in each ROI broken down by stimulus type  
366 (auditory, visual) and anesthetic protocol for each animal tested. Doing so allows BOLD signal  
367 variability to be observed across all ROIs (bilateral MGN, A1, & A2; LGN, 17, 18, & 19  
368 contralateral to the opened eye) and individual subjects. Across regions of interest, between-  
369 subjects variability in the BOLD signal evoked by stimuli to which a region is typically responsive  
370 (i.e. the signal recorded in A1/A2 in response to sound) was greater under ketamine plus  
371 isoflurane than under alfaxalone. Further, signals recorded in response to stimuli to which an  
372 ROI is *not* typically responsive (i.e. the signal recorded in areas 17/18/19 in response to sound),  
373 were also far more variable under Iso+Ket. This latter analysis provides a measure of signal  
374 variability in the absence of evoked activity (i.e. a measure of background activity under a given  
375 anesthetic agent).

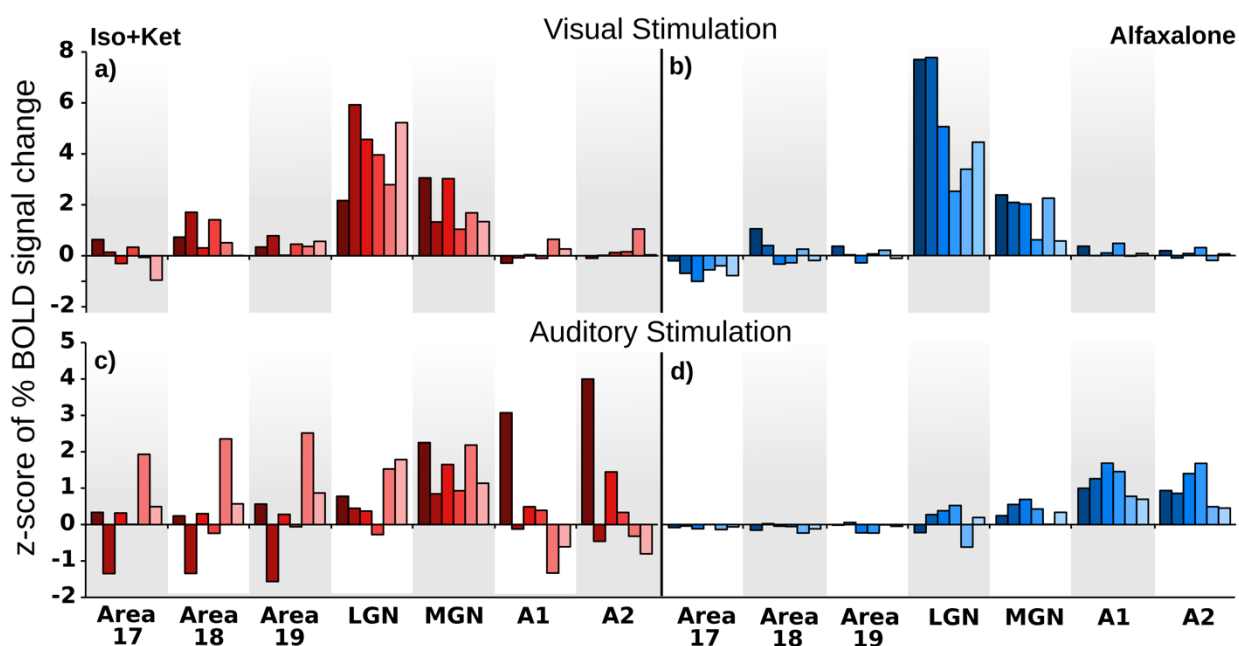

376  
377 **Figure 3** Individual z-scores of BOLD signal changes within all regions of interest in  
378 response to visual (a & b) and auditory (c & d) stimulation under coadministration  
379 of ketamine and isoflurane (a & c) or alfaxalone (b & d). Data are thresholded using  
380 clusters determined by  $Z > 2.3$  and a corrected cluster significance threshold of  
381  $p = 0.05$  (Worsley, 2001).  
382

383 To quantify variability in more detail, the range of the normalized BOLD signal across  
384 animals for each region of interest and anesthetic protocol is presented in Figure 4. With

385 respect to visually-evoked activity, the between-subjects variability in BOLD activity was highly  
386 similar across all ROIs. In response to sound, the signal recorded was less variable under  
387 alfaxalone than under co-administered ketamine and isoflurane across all ROIs. Thus, while  
388 both anesthetics evoke similar mean BOLD signal amplitudes (as evidenced by the absence of a  
389 statistically significant effect of anesthetic protocol, as described above), between-subjects  
390 variability is decreased under alfaxalone, notably in response to sounds.

391

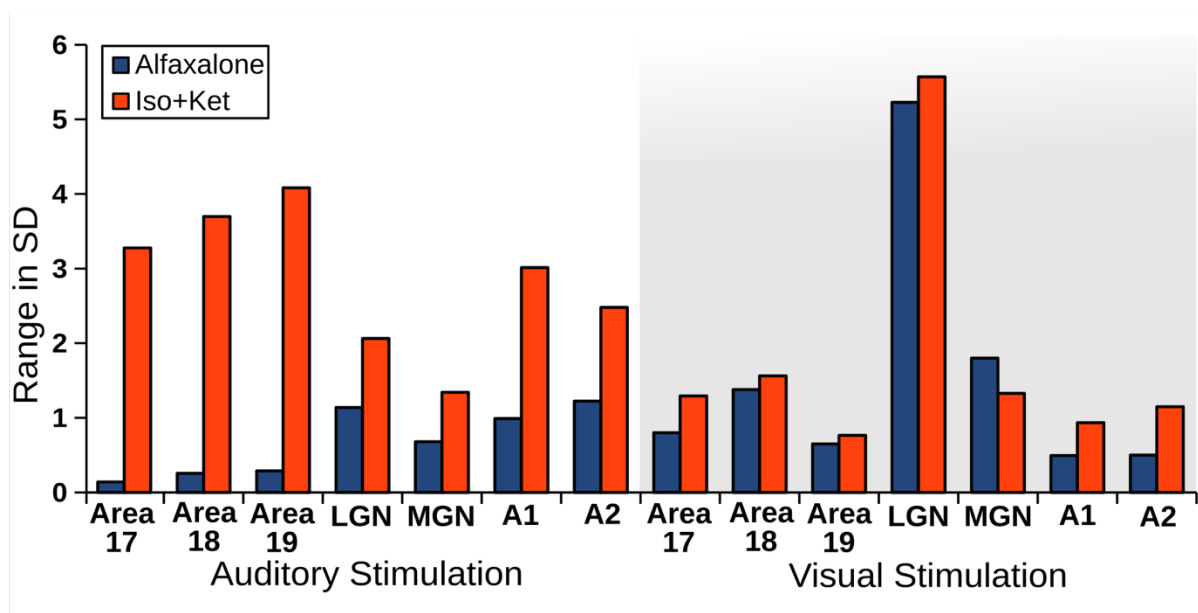

392

393 **Figure 4** Range (max-min) of z-scored percent BOLD signal change across animals for  
394 each region of interest studied, in response to auditory and visual stimuli under  
395 alfaxalone (blue) and co-administered ketamine and isoflurane (red).

396

#### 397 4. Discussion

398 This study was undertaken to compare and contrast potential anesthetic protocols for  
399 functional neuroimaging with a focus on 1) physiological stability and 2) optimizing BOLD signal  
400 across stimulus modalities. While all anesthetics affect neural function, their use remains  
401 necessary in most animal models to minimize movement and stress, and to ensure animal  
402 safety within the magnet. Thus, it is important to establish a regime that strikes a balance  
403 between achieving and maintaining safe and stable anesthesia, while optimizing cortical  
404 activity. Previous studies have used a variety of anesthetic agents in an attempt to optimize



405 responses; one common protocol involves the co-administration of ketamine and isoflurane–  
406 an approach that has been shown to allow for the observation of sound-evoked BOLD activity  
407 (Brown et al., 2013; Hall et al., 2014; Butler et al., 2015; Stolzberg et al., 2018). However, this  
408 combination can produce physiological instability and has suppressive effects on cortical  
409 activity (Zurita et al., 1994; Harel et al., 2002; Olman et al., 2003; Hodkinson et al., 2012). It  
410 therefore remains important to explore alternative and perhaps more reliable protocols. Here,  
411 we provide physiological and neuroimaging evidence that supports the use of alfaxalone as a  
412 stable and consistent anesthetic agent for neuroimaging.

#### 413 *4.1 Anesthesia and Physiology*

414 The primary goal of the physiological pilot described above, was to determine the safety  
415 and stability of candidate protocols using heart and respiratory rates as indicators. Importantly,  
416 these measures have been shown to reflect anesthetic depth (Musizza & Ribaric, 2010; Thomas  
417 & Lerche, 2011). Moreover, fluctuations in either heart or respiratory rate have been shown to  
418 interfere with neural signals measured by fMRI (Gao et al., 2017; Birn et al., 2003; Abbott et al.,  
419 2005; Kastrup et al., 1999). In part, the instability of co-administered ketamine and isoflurane  
420 reflects a simultaneous increase in ketamine infusion rate and decrease in isoflurane  
421 concentration approximately 60 minutes into an imaging session that is necessary to allow for  
422 BOLD signal visualization (Brown et al., 2013; Hall et al., 2014; Butler et al., 2015; Stolzberg et  
423 al., 2018). Thus, this previously established protocol includes a trade-off between measurable  
424 BOLD responses and increased risk of the animal becoming alert in the scanner. Conversely, the  
425 alfaxalone protocol described here maintains a constant infusion rate for the duration of the  
426 experimental session, and thus results in only small-scale changes in heart and respiratory rate  
427 over time, consistent with previous examinations of the anesthetic properties of alfaxalone for  
428 other applications (Beths et al., 2014; Muir et al., 2009). In addition to long-term stability,  
429 respiratory rate under alfaxalone was also shown to be more stable across shorter duration  
430 measurement intervals (5 min; Figure 2B). Both protocols examined attained safe levels of  
431 anesthetic depth for functional imaging; however, alfaxalone resulted in greater respiratory  
432 stability across individuals and sessions when compared to the co-administration of isoflurane  
433 and ketamine.

## 434 4.2 Anesthesia and BOLD

435 Having demonstrated the safety of both candidate protocols, the imaging experiment  
436 (Study 2) sought to compare and contrast BOLD signal changes evoked in auditory and visual  
437 thalamic and cortical regions of interest under each anesthetic. To the best of our knowledge,  
438 this is the first study to provide such a comparison. Here, we demonstrate that both protocols  
439 facilitate comparable mean levels of overall evoked BOLD activity across ROIs. These results are  
440 in accordance with similar mechanisms of action between alfaxalone and isoflurane (Lambert et  
441 al., 2003; Nakahiro et al., 1999). Examining these patterns of evoked activity in more detail,  
442 more reliable and consistent neural responses were observed under alfaxalone, evidenced by  
443 decreased BOLD signal variability across animals (Figures 3 & 4). Interestingly, this effect is most  
444 evident in sound-evoked activity, while patterns of BOLD activity evoked in response to visual  
445 stimuli are qualitatively similar across anesthetics in the current study. The reliability of  
446 recorded BOLD signals is highly important, as fMRI analyses often involve averaging or  
447 subtractive computations across blocks of data acquired over the duration of an imaging  
448 session. That the activity recorded under co-administered ketamine and isoflurane is highly  
449 variable within a given ROI means these between-block contrasts may be particularly  
450 susceptible to anesthetic effects. Interestingly, signals measured in brain regions not  
451 traditionally associated with a particular stimulus modality (e.g. BOLD signal estimates from  
452 primary visual cortex in response to auditory stimulation) were more variable under co-  
453 administered ketamine and isoflurane than under alfaxalone, suggesting signal variability  
454 associated with the former extends well beyond effects on stimulus-evoked activity. This  
455 activity may reflect between-subjects differences in non-selective suppression observed under  
456 isoflurane (Wu et al., 2016) or the potentially dissociative effects of ketamine (Abel et al., 2003)  
457 – either of which presents a challenge to the interpretation of stimulus-evoked signals.  
458 Substantial differences in evoked BOLD signal were observed in the current study across  
459 stimulus type. For example, greater thalamic activity was observed in response to visual stimuli  
460 than to sound. This could reflect a number of underlying causes, including differences in the  
461 extent to which the visual stimulus (a flashing, whole-field checkerboard) and auditory stimulus  
462 (white noise bursts) evoke robust activity within their respective ascending pathways.

463 Importantly, while the visual stimulus evoked a greater BOLD signal within the presumptive  
464 auditory nucleus of the thalamus (MGN) than did sound, the results suggest that only the  
465 sound-evoked activity resulted in cortical activation. Thus, while visually-evoked activity in MGN  
466 could reflect crossmodal inputs, or spatial spread of the robust activity recorded in the nearby  
467 LGN, only sound-evoked thalamic signals appear to be faithfully translated to auditory cortical  
468 activity. Increased consistency between individual animals and ROIs under alfaxalone suggests  
469 that it may be better suited for fMRI studies than the co-administration of isoflurane and  
470 ketamine.

471

## 472 **5. Conclusion**

473 Anesthetics are important to many experimental approaches in animal research.  
474 However, without good, consistently applied protocols for neuroimaging, findings from these  
475 studies remain difficult to consolidate, and the degree to which they can be generalized to  
476 understand the brain in its natural neural state remains unclear. In addition to the advantages  
477 described above, there are some practical implications that favor the use of alfaxalone: 1) a  
478 single-agent protocol is easier to maintain over extended testing, is preferred by veterinary  
479 staff, and reduces concerns related to drug interactions; 2) unlike ketamine, alfaxalone is not a  
480 controlled substance, and is thus easier to obtain and store; and 3) because anesthetic depth is  
481 more consistent across the testing session under alfaxalone, the duration of testing is more  
482 predictable and concerns related to the animal waking up within the magnet are reduced. For  
483 all of these reasons, we therefore propose that alfaxalone may be a superior anesthetic agent  
484 for the safe and reliable collection of fMRI data.

485

486

487

488

489 **6. Acknowledgments**

490 We would like to thank Stephen Gordon and Alessandra Sacco for their assistance with animal  
491 care and data collection, and Trevor Szekeres for technical assistance. This research was  
492 undertaken thanks to funding from the Canada First Research Excellence Fund awarded to  
493 BrainsCAN at Western University, the Natural Sciences and Engineering Research Council of  
494 Canada, Canadian Institutes of Health Research, and the Canada Foundation for Innovation.

495

496 **7. Competing Interests**

497 Declarations of interest: none

## 498 7. References

- 499 Abbott, D.F., Opdam, H.I., Briellmann, R.S., & Jackson, G.D. (2005). Brief breath holding may  
500 confound functional magnetic resonance imaging studies. *Human Brain Mapping, 24*(4),  
501 284-290.
- 502 Abel, K.M.m Allin, M.P., Kuscharska-Pietura, K., Andrew, C., Willaims, S., David, A.S., & Phillips,  
503 M.L. (2003). Ketamine and fMRI BOLD signal: distinguishing between effects mediated  
504 by change in blood flow versus change in cognitive state. *Human Brain Mapping, 18*(2),  
505 135-145.
- 506 Aksenov, D.P., Limin, L., Miller, M.J., Iordanescu, G., & Wyrwicz, A.M. (2015). Effects of  
507 anesthesia on BOLD signal and neuronal activity in the somatosensory cortex. *Journal of*  
508 *Cerebral Blood Flow and Metabolism, 35*(11), 1819-1826.
- 509 Baldy-Moulinier, M., Basset-Lehmann, J., & Passonaut, P. (1975). Effects of combination  
510 alfaxalone and alfadolone, anesthetic derivatives of pregnenedione, on cerebral  
511 hemodynamics in cats. *Comptes Rendus Des Seances de la Societe de Biologie et de Ses*  
512 *Filiales, 169*(1), 126-131.
- 513 Beths, T., Touzot-Jourde, G., Musk, G., & Pasloske, K. (2013). Clinical evaluation of alfaxalone to  
514 induce and maintain anesthesia in cats undergoing neutering procedures. *Journal of*  
515 *Feline Medicine and Surgery, 16*(8), 609-615.
- 516 Biermann, K., Hungerbühler, S., Mischke, R., & Kästner, S.B.R. (2012). Sedative, cardiovascular,  
517 haematologic and biochemical effects of four different drug combinations administered  
518 intramuscularly in cats. *Veterinary Anaesthesia and Analgesia, 39*(2), 137-150.
- 519 Birn, R.M., Smith, M.A., Jones, T.B., & Bandettini, P.A. (2008). The respiration response  
520 function: the temporal dynamics of fMRI signal fluctuations related to changes in  
521 respiration. *NeuroImage, 40*(2), 644-654.
- 522 Blake, R. (1979). The visual system of the cat. *Perception and Psychophysics, 26*(6), 423-448.
- 523 Bonhomme, V., Fiset, P., Meuret, P., Backman, S., Plourde, G., Paus, T., Bushnell, M.C., & Evans,  
524 A.C. (2000). Propofol anesthesia and cerebral blood flow changes elicited by vibrotactile  
525 stimulation: a positron emission tomography study. *Journal of Neurophysiology, 85*(3),  
526 1299-1308.

- 527 Brown, T.A., Joannisse, M.F., Gati, J.S., Hughes, S.M., Nixon, P.L., Menon, R.S., & Lomber, S.G.  
528 (2013). Characterization of the blood-oxygen level-dependent (BOLD) response in cat  
529 auditory cortex using high-field fMRI. *NeuroImage*, *64*, 458-465.
- 530 Brown, T.A., Gati, J.S., Hughes, S.M., Nixon, P.L., Menon, R.S., & Lomber S.G. (2014). Functional  
531 imaging of auditory cortex in adult cats using high-field fMRI. *Journal of Visualized*  
532 *Experiments*, (84), e50872, doi:10.3791/50872.
- 533 Butler, B.E., Chabot, N., & Lomber, S.G. (2016). Quantifying and comparing the pattern of  
534 thalamic and cortical projections to the posterior auditory field in hearing and deaf cats.  
535 *Journal of Comparative Neurology*, *524*(15), 3042-3063.
- 536 Butler, B.E., Hall, A.J., & Lomber, S.G. (2015). High-field functional imaging of pitch processing in  
537 auditory cortex of the cat. *PLoS One*, *10*(7), e0134362.  
538 <https://doi.org/10.1371/journal.pone.0134362>.
- 539 Buxton, R.B. & Frank, L.R. (1997). A model for the coupling between cerebral blood flow and  
540 oxygen metabolism during neural stimulation. *Journal of Cerebral Blood Flow and*  
541 *Metabolism*, *17*(1), 64-72.
- 542 Crosby, G., Crane, A.M., & Sokoloff, L. (1984). Local changes in cerebral glucose utilization  
543 during ketamine anesthesia. *Anesthesiology*, *56*(6), 437-443.
- 544 Deutsch, J., Jolliffe, C., Archer, E., & Leece, E.A. (2017). Intramuscular injection of alfaxalone in  
545 combination with butorphanol for sedation in cats. *Veterinary Anaesthesia and*  
546 *Analgesia*, *44*(4), 794-802.
- 547 Dueck, M.H., Petzke, F., Gerbershagen, H.J., Paul, M., Hebelmann, V., Girnus, R., ... Boerner, U.  
548 (2005). Propofol attenuates responses of the auditory cortex to acoustic stimulation in a  
549 dose-dependent manner: a fMRI study. *Acta Anaesthesiologica Scandinavica*, *49*(6),  
550 784-791.
- 551 Ferris, C.F., Febo, M., Luo, F., Schmidt, K., Brevard, M., Harder, J.A., ... King, J.A. (2006).  
552 Functional magnetic resonance imaging in conscious animals: a new tool in behavioral  
553 neuroscience research. *Journal of Neuroendocrinology*, *18*(5), 307-318.
- 554 Freeman, J., & Ingvar, H. (1967). Effects of fentanyl on cerebral cortical blood flow and EEG in  
555 the cat. *Acta Anaesthesiologica Scandinavica*, *11*(4), 381-391.

- 556 Fukuda, M., Vazquez, A.L., Zong, X., & Kim, S.G. (2013). Effects of the alpha 2-adrenergic  
557 receptor agonist dexmedetomidine on neural, vascular and BOLD fMRI responses in the  
558 somatosensory cortex. *European Journal of Neuroscience*, 37(1), 80-95.
- 559 Gao, Y.R., Ma, D., Zhang, Q., Winder, A.T., Liang, Z., Antinori, L., Drew, P.J., & Zhang, N. (2017).  
560 Time to wake up: Studying neurovascular coupling and brain-wide circuit function in the  
561 un-anesthetized animal. *NeuroImage*, 153, 382-398.
- 562 Hall, A.J., Brown, T.A., Grahn, J.A., Gati, J.S., Nixon, P.L., Hughes, S.M., Menon, R.S., & Lomber,  
563 S.G. (2014). There's more than one way to scan a cat: Imaging cat auditory cortex with  
564 high-field fMRI using continuous or sparse sampling. *Journal of Neuroscience Methods*,  
565 224, 96-106.
- 566 Harel, N., Lee, S.P., Nagaoka, T., Kim, D.S., & Kim, S.G. (2002). Origin of negative blood  
567 oxygenation level-dependent MRI signals. *Journal of Cerebral Blood Flow and*  
568 *Metabolism*, 22(8), 908-917.
- 569 Heffner, R.S., & Heffner, H.E. (1988). Sound localization acuity in cat: Effect of azimuth, signal  
570 duration, and test procedure. *Hearing Research*, 36(2-3), 221-232.
- 571 Heil, P., & Irvine, D.R. (1998). Functional specialization in auditory cortex: responses to  
572 frequency-modulated stimuli in cat's posterior auditory field. *Journal of*  
573 *Neurophysiology*, 79(6), 3041-3059.
- 574 Hodkinson, D.J., de Groote, C., McKie, S., William Deakin, J.F., & Williams, S.R. (2012).  
575 Differential effects on anaesthesia on the pHMRI response to acute ketamine challenge.  
576 *British Journal of Medicine and Medical Research*, 2(3), 373-385.
- 577 Hoflich, A., Hahn, A., Kublbock, M., Kranz, G.S., Vanicek, T., Ganger, S., ... Lanzenberger, R.  
578 (2017). Ketamine-dependent neuronal activation in healthy volunteers. *Brain Structure*  
579 *and Function*, 222(3), 1533-1542.
- 580 Hubel, D.H., & Wiesel, T.N. (1962). Receptive fields, binocular interaction and functional  
581 architecture in the cat's visual cortex. *Journal of Physiology*, 160(1), 106-154.
- 582 Jenkinson, M., Bannister, P., Brady, M., & Smith, S. (2002). Improved optimization for the robust  
583 and accurate linear registration and motion correction of brain images. *NeuroImage*,  
584 17(2), 825-841.

- 585 Jezzard, P., Rauschecker, J.P., & Malonek, D. (1997). An in vivo model for functional MRI in cat  
586 visual cortex. *Magnetic Resonance in Medicine*, 38(5), 699-705.
- 587 Kaitin, K.I. (1985). Effects of thalidomide and pentobarbital on neuronal activity in the preoptic  
588 area during sleep and wakefulness in the cat. *Psychopharmacology*, 85(1), 47-50.
- 589 Kastrup, A., Liu, T.Q., Glover, G.H., & Moseley, M.E. (1999). Cerebral blood flow-related signal  
590 changes during breath-holding. *American Journal of Neuroradiology*, 20(7), 1233-1238.
- 591 Klassen, L.M., & Menon, R.S. (2004). Robust automated shimming technique using arbitrary  
592 mapping acquisition parameters (RASTAMAP). *Magnetic Resonance in Medicine*, 51(5),  
593 881-887.
- 594 Lahti, K.M., Ferris, C.F., Li, F., Sotak, C.H., & King, J.A. (1999). Comparison of evoked cortical  
595 activity in conscious and propofol-anesthetized rats using functional MRI. *Magnetic  
596 Resonance in Medicine*, 41(2), 412-416.
- 597 Lambert, J.J., Belelli, D., Peden, D.R., Vardy, A.W., & Peters, J.A. (2003). Neurosteroid  
598 modulation of GABA<sub>A</sub> receptors. *Progress in Neurobiology*, 71(1), 67-80.
- 599 Liu, Y., Qin, L., Zhang, X., Dong, C., & Sato, Y. (2010). Neural correlates of auditory temporal-  
600 interval discrimination in cats. *Behavioural Brain Research*, 215(1), 28-38.
- 601 Logothetis, N.K., Pauls, J., Augath, M., Trinath, T., & Oeltermann, A. (2001). Neurophysiological  
602 investigation of the basis of the fMRI signal. *Nature*, 412(6843), 150-157.
- 603 Lomber, S.G., MacNeil M.A., & Payne, B.R. (2010). Amplification of thalamic projections to  
604 middle suprasylvian cortex following ablation of immature primary visual cortex in the  
605 cat. *Cerebral Cortex*, 5(2),166-191.
- 606 Miller, L.M., Escabi, M.A., Read, H.L., & Schreiner, C.E. (2002). Spectrotemporal receptive fields  
607 in the lemniscal auditory thalamus and cortex. *Journal of Neurophysiology*, 87(1), 516-  
608 527.
- 609 Morin-Surun, M.P., Champagnat, J., Denavit-Saubie, M., & Moyanova, S. (1984). The effects of  
610 acetylcholine on bulbar respiratory related neurons: Consequences of anaesthesia by  
611 pentobarbital. *Archives of Pharmacology*, 325(3), 205-208.



- 612 Muir, W., Lerche, P., Wiese, A., Nelson, L., Pasloske, K., & Whittam, T. (2009). The  
613 cardiorespiratory and anesthetic effect of clinical and supraclinical doses of alfaxalone in  
614 cats. *Veterinary Anaesthesia and Analgesia*, *36*(1), 42-54.
- 615 Musizza, B., & Ribaric, S. (2010). Monitoring the depth of anaesthesia. *Sensors (Basel,*  
616 *Switzerland)*, *10*(12), 10896-10935.
- 617 Myes, P.S. (2007). Prevention of awareness during anaesthesia. *Best Practice and Research:*  
618 *Clinical Anaesthesiology*, *21*(3), 345-355.
- 619 Nagakubo, D., Hamamoto, Y., Hasegawa, D., Kamata, M., Iizuka, T., Muta, K., Fujita, N.,  
620 Nakagawa, T., & Nishimura, R. (2017). Functional MRI-based identification of brain  
621 regions activated by mechanical noxious stimulation and modulatory effect of  
622 remifentanil in cats. *Research in Veterinary Science*, *114*, 444-449.
- 623 Nagore, L., Soler, C., Gil, L., Serra, I., Soler, G., & Redondo, J.I. (2013). Sedative effects of  
624 dexmedetomidine, dexmedetomidine-pethidine and dexmedetomidine-butorphanol in  
625 cats. *Journal of Veterinary Pharmacology and Therapeutics*, *36*(3), 222-228.
- 626 Nakahiro, M., Yeh, J.Z., Brunner, E. & Narahashi, T. (1999). General anesthetics modulate GABA  
627 receptor channel complex in rat dorsal root ganglion neurons. *Federation of American*  
628 *Societies for Experimental Biology*, *3*(7), 1850-1854.
- 629 Ogawa, S., Lee, T.M., Kay, A.R., & Tank, D.W. (1990). Brain magnetic resonance imaging with  
630 contrast dependent on blood oxygenation. *Proceedings of the National Academy of*  
631 *Sciences (USA)*, *87*(24), 9868-9872.
- 632 Olman, C., Ronen, I., Ugurbil, K., Kim, D.S. (2003). Retinotopic mapping in cat visual cortex using  
633 high-field functional magnetic resonance imaging. *Journal of Neuroscience Methods*,  
634 *131*(1-2), 161-170.
- 635 Oye, I., Paulsen, O., & Maurset, A. (1992). Effects of ketamine on sensory perception: evidence  
636 for a role of N-methyl D-aspartate. *Journal of Pharmacological and Experimental*  
637 *Therapeutics*, *260*(3), 1209-1213.
- 638 Paddleford, R.R. (1999). *Manual of small animal anesthesia*. Philadelphia, Pennsylvania: W.B.  
639 Saunders Company.

- 640 Peirce, J.W. (2007). Psychophysics software in Python. *Journal of Neuroscience Methods*, 162(1-  
641 2), 8-13. doi:10.1016/j.jneumeth.2006.11.017.
- 642 Peirce J.W. (2009). Generating stimuli for neuroscience using PsychoPy. *Frontiers in*  
643 *Neuroinformatics*, 2(10), 1-8. doi:10.3389/neuro.11.010.2008.
- 644 Peng, Y.Z., Li, X.X., & Wang, Y.W. (2010). Effects of parecoxib and fentanyl on nociception-  
645 induced cortical activity. *Molecular Pain*, 6(3), doi: 10.1186/1744-8069-6-3.
- 646 Pienkowski, M., & Eggermont, J.J. (2009). Long-term, partially-reversible reorganization of  
647 frequency tuning in mature cat primary auditory cortex can be induced by passive  
648 exposure to moderate-level sounds. *Hearing Research*, 257(1-2), 24-40.
- 649 Richards, C.D. (1983). Actions of general anaesthetics on synaptic transmission in the CNS.  
650 *British Journal of Anaesthesia*, 55(3), 201-207.
- 651 Ries, C.R., & Puil, E. (1999). Mechanism of anesthesia revealed by shunting actions of isoflurane  
652 on thalamocortical neurons. *Journal of Neurophysiology*, 81(4), 1795-1801.
- 653 Rorden, C., & Brett, M. (2000). Stereotaxic display of brain lesions. *Behavioral Neurology*, 12(4),  
654 191-200.
- 655 Ros, C., Soler, C., & Mateo, A.G.G.C. (2017). Comparison of brainstem auditory evoked  
656 responses during sevoflurane or alfaxalone anaesthesia in adult cats. *Veterinary*  
657 *Anaesthesia and Analgesia*, 44(5), 1085-1090.
- 658 Smith, S.M., Jenkinson, M., Woolrich, M.W., Beckmann, C.F., Behrens, T.E.J., Johansen-Berg, H.,  
659 ... Matthews, P.M. (2004). Advances in functional and structural MR image analysis and  
660 implementation as FSL. *NeuroImage*, 23(S1), 208-219.
- 661 Stolzberg, D., Wong, C., Blake, B.E., & Lomber, S.G. (2017). Atlas: A magnetic resonance  
662 imaging-based three-dimensional cortical atlas and tissue probability maps for the  
663 domestic cat (*Felis Catus*). *Journal of Comparative Neurology*, 525(15), 3190-3206.
- 664 Stolzberg, D., Blake, B.E., & Lomber, S.G. (2018). Effects of neonatal deafness on resting-state  
665 functional network connectivity. *NeuroImage*, 165, 69-82.
- 666 Taboada, F.M., & Murison, P.J. (2010). Induction of anesthesia with alfaxalone or propofol  
667 before isoflurane maintenance in cats. *Veterinary Records*, 167(3), 85-89.

- 668 Tamura, J., Ishizuka, T., Fukui, S., Oyama, N., Kawase, K., Itami, T., ... Yamashita, K. (2015).  
669 Sedative effects of intramuscular alfaxalone administered to cats. *Journal of Veterinary*  
670 *Medical Science*, 77(8), 874-904.
- 671 Thomas, J.A., & Lerche, P. (2011). *Anesthesia and analgesia for veterinary technicians*. St. Louis:  
672 Elsevier.
- 673 Ueki, M., Mies, G., & Hossmann, K.A. (1992). Effects of alpha-chloralose, halothane,  
674 pentobarbital and nitrous oxide anesthesia on metabolic coupling in somatosensory  
675 cortex of rat. *Anaesthesiologica Scandinavica*, 36(4), 318-322.
- 676 Warne, L.N., Beths, T., Whittem, T., Carter, J.E., & Bauquier, S.H. (2015). A review of the  
677 pharmacology and clinical application of alfaxalone in cats. *The Veterinary Journal*, 203,  
678 141-148.
- 679 White, N.S., & Alkire, M.T. (2003). Impaired thalamocortical connectivity in humans during  
680 general-anesthesia-induced unconsciousness. *NeuroImage*, 19(2), 402-411.
- 681 Whittem, T., Pasloske, K.S., Heit, M.C., & Ransinghe, M.G. (2008). The pharmacokinetics and  
682 pharmacodynamics of alfaxalone in cats after single and multiple intravenous  
683 administration of Alfaxan at clinical and supraclinical doses. *Journal of Veterinary*  
684 *Pharmacology*, 31(6), 571-579.
- 685 Woolrich, M.W., Ripley, B.D., Brady, M., & Smith, S.M. (2001). Temporal autocorrelation in  
686 univariate linear modeling of fMRI data. *NeuroImage*, 14(6) , 1370-1386.
- 687 Wong, C., Chabot, N., Kok, M.A., & Lomber, S.G. (2015). Amplified somatosensory and visual  
688 cortical projections to a core auditory area, the anterior auditory field, following early-  
689 and late-onset deafness: Modified projections to AAF following deafness. *Journal of*  
690 *Comparative Neurology*, 523(13), 1925-1947.
- 691 Wong, C., Pearson, K.G., & Lomber, S.G. (2018). Contributions of parietal cortex to the working  
692 memory of an obstacle acquired visually or tactilely in the locomoting cat. *Cerebral*  
693 *Cortex*, 28(9), 3143-3158.
- 694 Worsley, K.J. Statistical analysis of activation images. (2001) In: Jezzard, P., Matthews, P.M., &  
695 Smith, S.M. (2002). *Functional MRI: an introduction to methods*. Oxford: Oxford  
696 University Press.

697 Wu, T.L., Mishra, A., Wang, F., Yang, P.F., Gore, J.C., & Chen, L.M. (2016). Effects of isoflurane  
698 anesthesia on resting-state fMRI signals and functional connectivity within primary  
699 somatosensory cortex of monkeys. *Brain and Behavior*, 6(12), 2016.

700 Zurita, P., Villa, A.E.P., de Ribaupierre, Y., de Ribaupierre, F., Rouiller, E.M. (1994). Changes of  
701 single unit activity in the cat auditory thalamus and cortex associated with different  
702 anesthetic conditions. *Neuroscience Research*, 19(3), 303-316.

703

704
